# Supplementary material
Source: Springer Nature journal article supplement (https://www.springermedizin.de/resource/supplementary/12880_2008_49_MOESM1_ESM.pdf/9450462)

**a**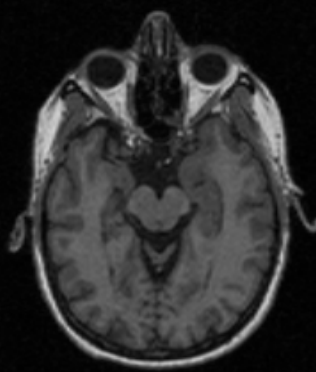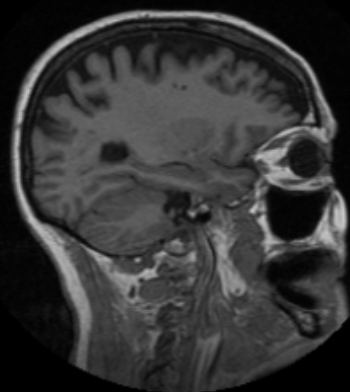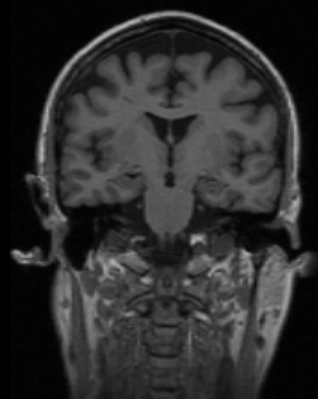**b**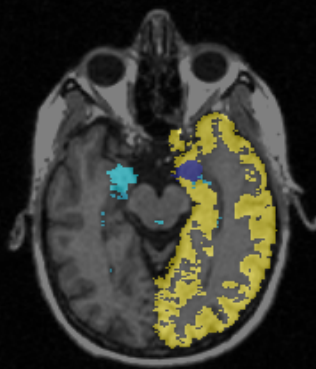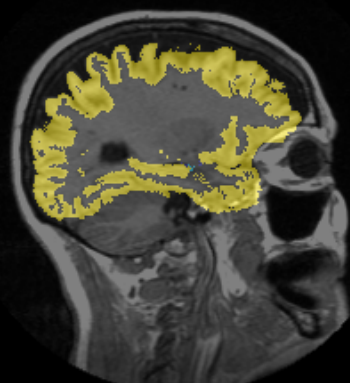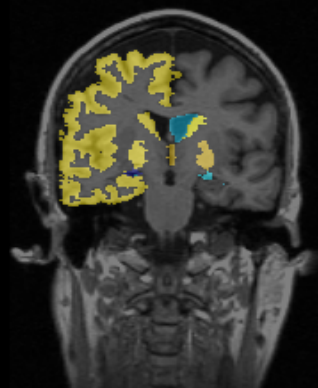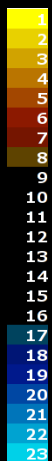**c**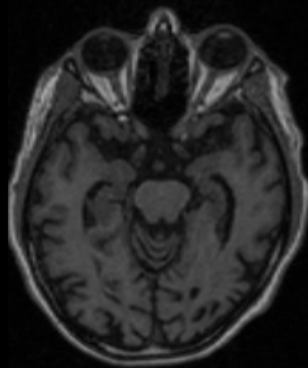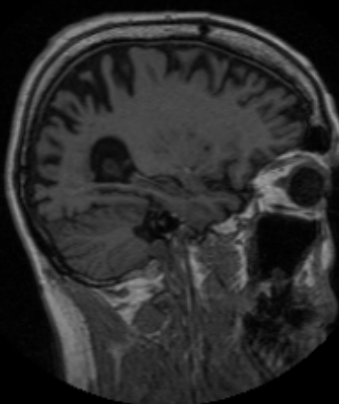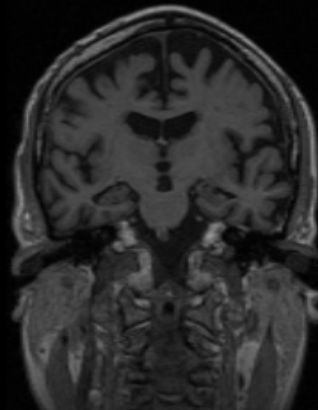**d**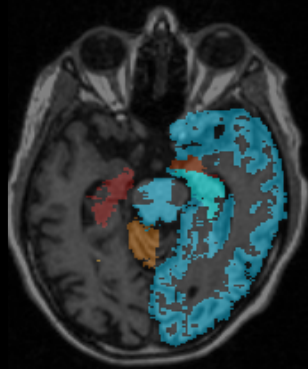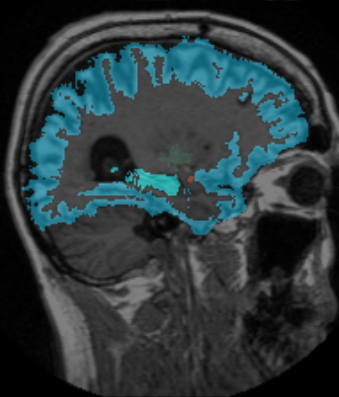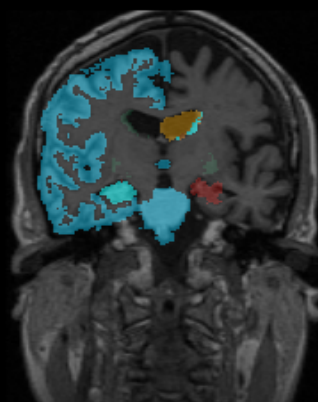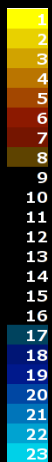

Supplement: MOESM1 [file 9450462]
